# Supplementary material for: An immune-humanized patient-derived xenograft model of estrogen-independent, hormone receptor positive metastatic breast cancer
Source: Springer Nature journal article supplement (doi:10.1186/s13058-021-01476-x), 2021-10-30

Suppl. Fig. 1

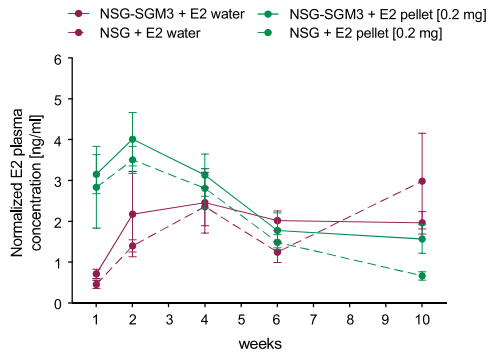

Suppl. Fig. 2

**a**

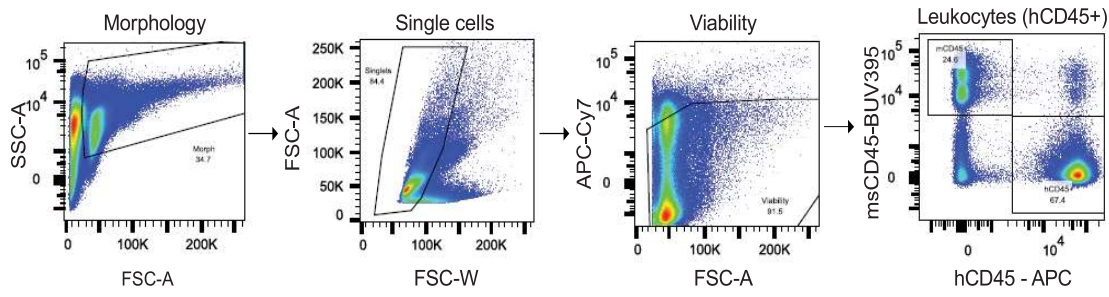

**b**

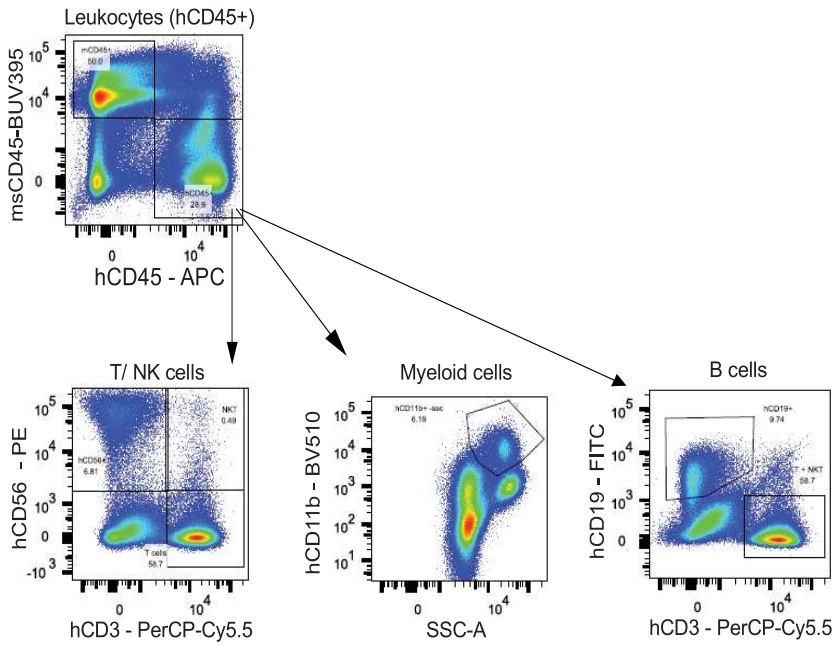

Suppl. Fig. 3

| ANTIBODY                                                                                | METHOD  | AR        | DILUTION     | INCUBATION | VENDOR, CATALOG NUMBER            |
|-----------------------------------------------------------------------------------------|---------|-----------|--------------|------------|-----------------------------------|
| <b>Anti-Cytokeratin, clone CAM5.2</b>                                                   | IHC     | Trypsin   | Neat         | 1h; RT     | BD Biosciences, #349205           |
| <b>Cleaved Caspase 3 (Asp175), clone 5A1E</b>                                           | IHC     | pH 6      | 1/150        | 1h; RT     | Cell Signaling Technology, #9664  |
| <b>CD3, clone LN10</b>                                                                  | IHC     | pH 9 (T)  | 1/250        | 1h; 37C    | Leica Biosystems, #NCL-L-CD3-565  |
| <b>CD20cy, clone L26</b>                                                                | IHC     | pH 6      | 1/200        | 45', RT    | Agilent Technologies, #M0755      |
| <b>CD31 (PECAM-1), clone D8V9E</b>                                                      | IHC     | pH 6      | 1/70         | 1h; RT     | Cell Signaling Technology, #77699 |
| <b>CD45, clone PD7/26 + 2B11</b>                                                        | IHC; IF | pH 6      | 1/50         | 1h; RT     | Agilent Technologies, #M0701      |
| <b>CD56 (NCAM), clone CD564</b>                                                         | IHC     | pH 10 (T) | 1/50         | 1h; RT     | Leica, #NCL-L-CD56-504            |
| <b>ERa, clone SP1</b>                                                                   | IHC     | pH 9 (T)  | 1/35         | 1h; RT     | Thermo Fisher, #MA139540          |
| <b>Itgam/CD11b, clone D6X1N</b>                                                         | IHC; IF | pH 6      | 1/50         | 1h; RT     | Cell Signaling Technology, #49420 |
| <b>Phospho Histone H3 (Ser10)</b>                                                       | IHC     | pH 6      | 1/150        | 1h; RT     | Cell Signaling Technology, #9701  |
| <b>EnVision+ Single Reagents (HRP. Mouse)</b>                                           | IHC     | -         | Ready-to-use | 30 min; RT | Agilent Technologies, #K4001      |
| <b>EnVision+ Single Reagents (HRP. Rabbit)</b>                                          | IHC     | -         | Ready-to-use | 30 min; RT | Agilent Technologies, #K4003      |
| <b>Biotinylated IgG Secondary Antibody, Anti-Rb</b>                                     | IHC; IF | -         | 1/250        | 30 min; RT | Vector Labs, #BA-9200             |
| <b>Biotinylated IgG Secondary Antibody, Anti-Ms</b>                                     | IHC; IF | -         | 1/200        | 30 min; RT | Vector Labs, #BA-1000             |
| <b>Goat anti-Rb IgG (H+L) Highly Cross-Adsorbed Secondary Antibody, Alexa Fluor 555</b> | IF      | -         | 1/500        | 30 min; RT | Thermo Fisher, #A-21429           |

AR = Antigen Retrieval; IF = Immunofluorescence; IHC = Immunohistochemistry; Ms = Mouse; ON = overnight; pH 6 = Sodium Citrate Buffer; pH 9 = Tris-EDTA Buffer; pH 10 = Tris Buffer; Rb = Rabbit; RT = room temperature; T = Tween 20 (0.05%)

Suppl. Fig. 4

QuPath quantification

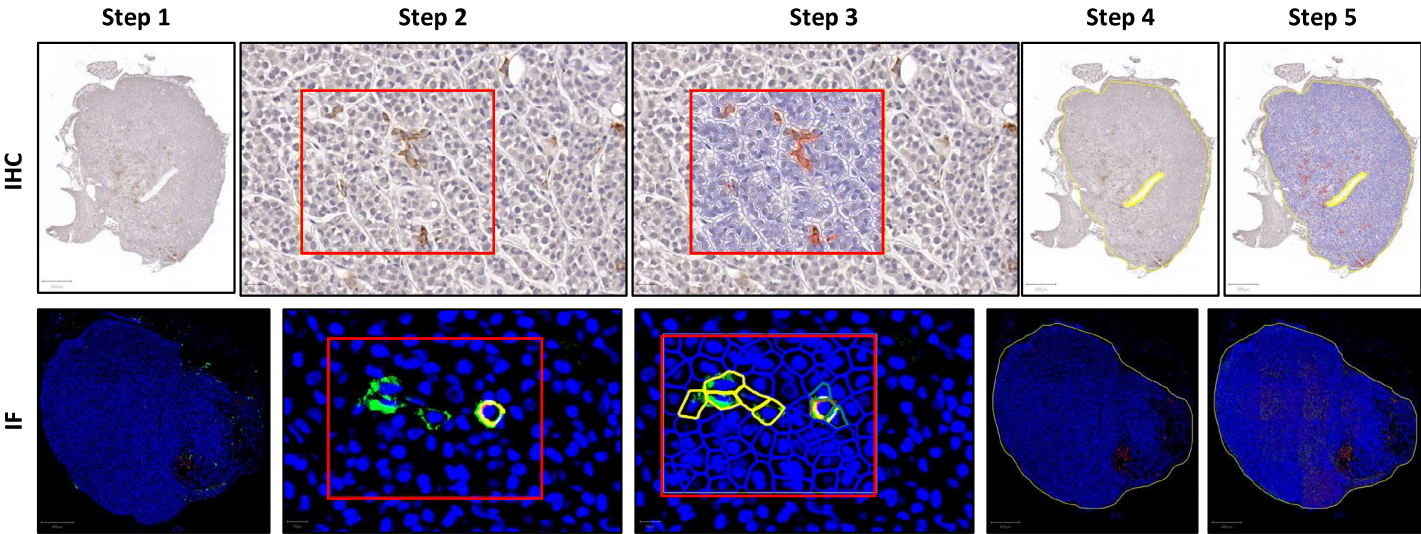

Suppl. Fig. 5

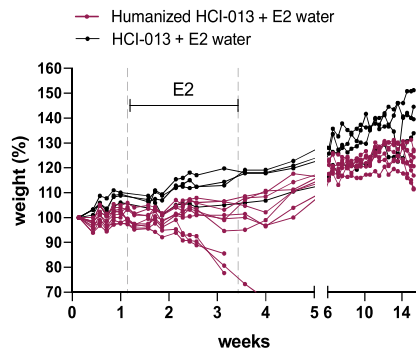

Suppl. Fig. 6

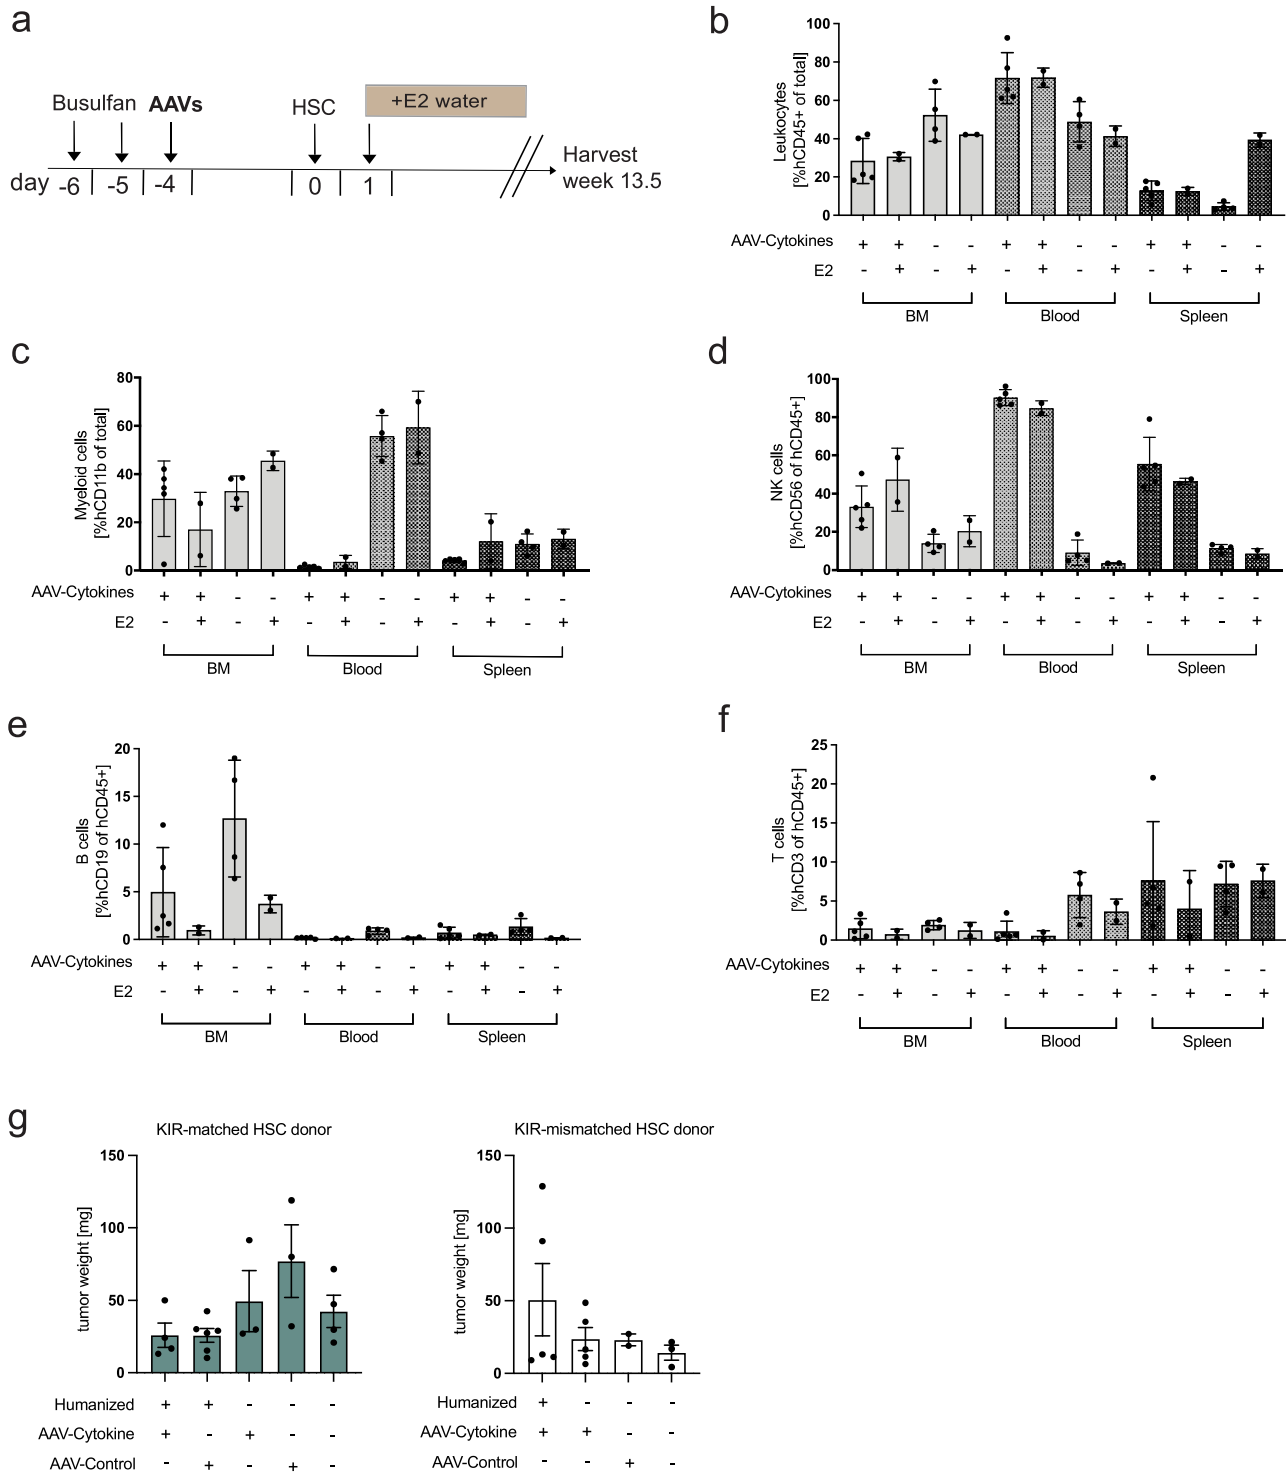

Supplement: MOESM1 [file 19814210]
